# Supplementary material for: Anti microbial corrosion properties of electrospun cellulose acetate nanofibers containing biogenic silver nanoparticles for copper coatings
Source: Royal Society of Chemistry journal article supplement (doi:10.1039/d0ra07641d), 2020-01-01

Table S1. Electrochemical parameters of bare Cu, Cu coated with cellulose acetate nanofiber, Cu coated with cellulose acetate nanofiber contain 5% AgNPs in artificial seawater and artificial seawater inoculated with bacterium

| In Artificial Seawater           | polarization data                |                                           |                                                                |                                                                   |
|----------------------------------|----------------------------------|-------------------------------------------|----------------------------------------------------------------|-------------------------------------------------------------------|
|                                  | $E_{\text{corr}}$ , V vs Ag/AgCl | $I_{\text{corr}}$ , $\mu\text{A cm}^{-2}$ | Anodic Tafel slope<br>$\beta_{\text{a}}$ , V dec <sup>-1</sup> | Cathodic Tafel slope<br>$-\beta_{\text{c}}$ , V dec <sup>-1</sup> |
| Cu                               | $-0.123 \pm 0.02$                | $42.56 \pm 0.45$                          | $0.111 \pm 0.01$                                               | $0.253 \pm 0.01$                                                  |
| Cu_CA-Nf                         | $-0.179 \pm 0.01$                | $19.02 \pm 0.2$                           | $0.100 \pm 0.01$                                               | $0.188 \pm 0.02$                                                  |
| Cu_5%AgNPs-CA-Nf                 | $-0.114 \pm 0.01$                | $14.55 \pm 1.4$                           | $0.068 \pm 0.01$                                               | $0.165 \pm 0.01$                                                  |
| Cu_ <i>E. coli</i>               | $-0.32 \pm 0.02$                 | $109.9 \pm 4.8$                           | $0.527 \pm 0.01$                                               | $0.588 \pm 0.01$                                                  |
| Cu_CA-Nf_ <i>E. coli</i>         | $-0.156 \pm 0.02$                | $5.42 \pm 0.4$                            | $0.105 \pm 0.01$                                               | $0.171 \pm 0.02$                                                  |
| Cu_5%AgNPs-CA-Nf_ <i>E. coli</i> | $-0.167 \pm 0.02$                | $25.97 \pm 2.46$                          | $0.103 \pm 0.01$                                               | $0.174 \pm 0.02$                                                  |

Table S2. Electrochemical model impedance parameters of the bare Cu, Cu coated with cellulose acetate nanofiber, Cu coated with cellulose acetate nanofiber contain 5% AgNps in artificial seawater and artificial seawater inoculated with bacteria

| In Artificial Seawater           | impedance data             |                            |                               |                                        |        |                                       |        |
|----------------------------------|----------------------------|----------------------------|-------------------------------|----------------------------------------|--------|---------------------------------------|--------|
|                                  | $R_s, \Omega \text{ cm}^2$ | $R_p, \Omega \text{ cm}^2$ | $R_{ct}, \Omega \text{ cm}^2$ | $Q_{CPE}, \Omega^{-1} \text{ cm}^{-2}$ | $\eta$ | $Q_{dl}, \Omega^{-1} \text{ cm}^{-2}$ | $\eta$ |
| Cu                               | 7.672                      | 152.9                      | 36.07                         | $2.016 \times 10^{-3}$                 | 0.61   | $1.208 \times 10^{-6}$                | 0.87   |
| Cu_CA-Nf                         | 1.997                      | 46.11                      | 653.5                         | $1.767 \times 10^{-6}$                 | 0.79   | $5.46 \times 10^{-4}$                 | 0.69   |
| Cu_5%AgNPs-CA-Nf                 | 8.507                      | 42.76                      | 359.7                         | $1.421 \times 10^{-6}$                 | 0.84   | $4.427 \times 10^{-4}$                | 0.65   |
| Cu_ <i>E. coli</i>               | 5.378                      | 46.4                       | 232.8                         | $1.973 \times 10^{-6}$                 | 0.46   | $1.913 \times 10^{-3}$                | 0.72   |
| Cu_CA-Nf_ <i>E. coli</i>         | $4.64 \times 10^{-5}$      | 75.11                      | 1062                          | $1.931 \times 10^{-5}$                 | 0.59   | $9.866 \times 10^{-4}$                | 0.62   |
| Cu_5%AgNPs-CA-Nf_ <i>E. coli</i> | $1.072 \times 10^{-4}$     | 45.08                      | 276                           | $3.095 \times 10^{-6}$                 | 0.73   | $1.248 \times 10^{-3}$                | 0.75   |

$R_s$  resistance of solution

$R_p$  resistance of passive film/biofilm pores

$R_{ct}$  resistance of charge transfer

$Q_{CPE}$  CPE parameters

$Q_{dl}$  electric double layer

$\eta$  dispersion parameters

Figure S1. Equivalent circuits used for fitting the impedance spectra

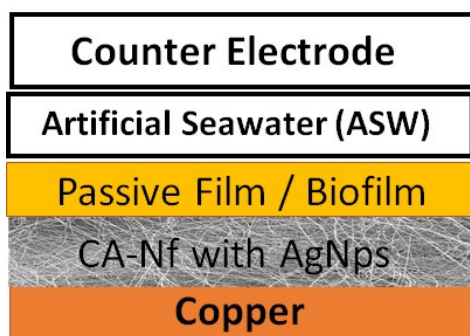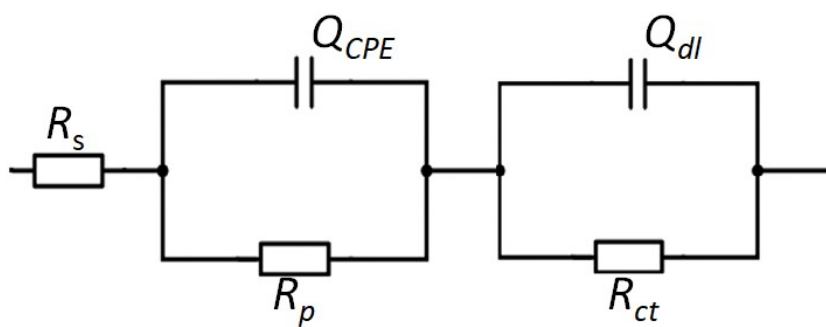

Figure S2. Nyquist fitted plots according to the equivalent circuit

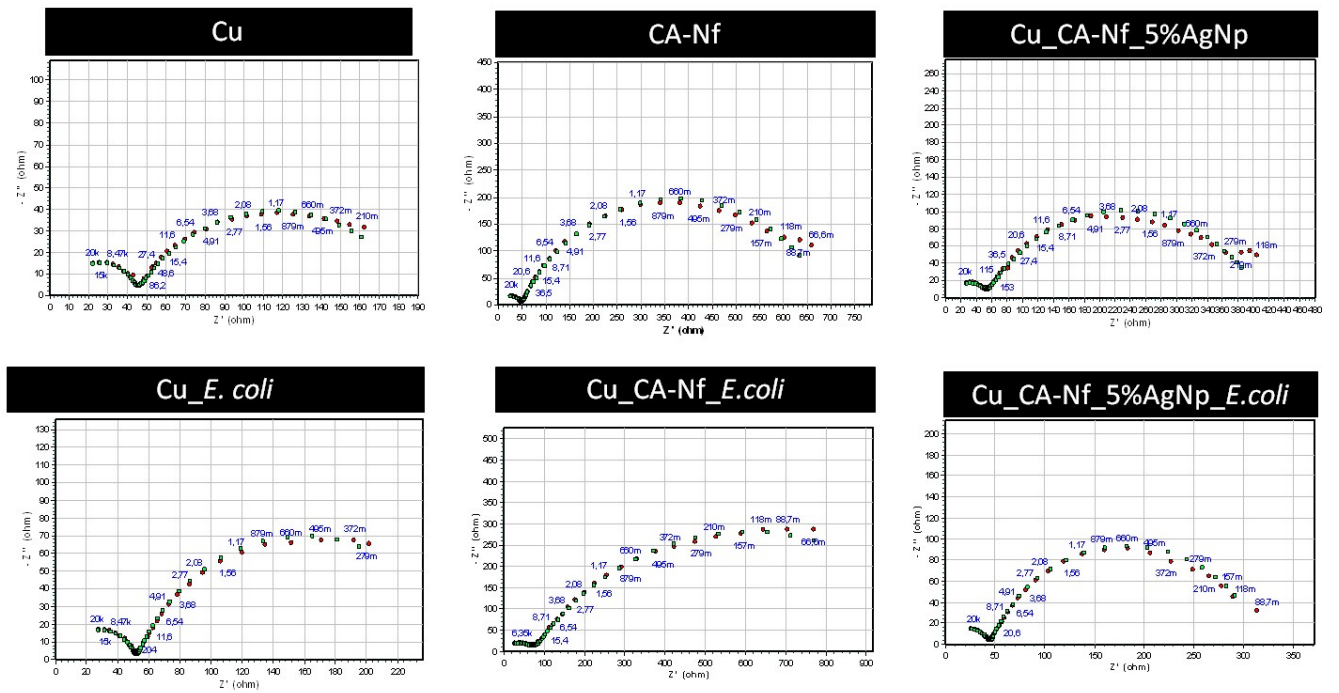

Supplement: d0ra07641d1.pdf [file d0ra07641d1.pdf]
